# Supplementary material
Source: PubMed Central journal article supplement (PMC3356596)

## Supplemental Material

This figure is related to main text figures 3, 4 and 5. This figure shows the pore-forming activity of GFP-tagged SLO, and was requested by the reviewers who suggested it be included as a supplemental figure.

**Figure S1. GFP-SLO displays normal pore forming activity. (A, B)** Cells were incubated or not with increasing concentrations of GFP-SLO for 5 min at 4°C, washed and shifted to 37°C with or without Ca<sup>2+</sup> for 4 min, before adding PI for 1 min to assess pore forming activity and membrane repair. **A.** Representative images showing that under no repair conditions (in the absence of Ca<sup>2+</sup>) GFP-SLO induces pore formation and strong nuclear PI staining. Under repair conditions (in the presence of Ca<sup>2+</sup>) PI staining is only observed after exposure to high GFP-SLO concentrations. Bar = 10 μm. **B.** Quantification of the percentage of PI positive nuclei reflecting increasing pore forming activity in the absence of Ca<sup>2+</sup>, and plasma membrane repair and PI exclusion in the presence of Ca<sup>2+</sup>. Results are expressed as the mean ± SEM of 5 random fields. \*\* P<0.01, \*\*\* P<0.001, unpaired Student's T test.

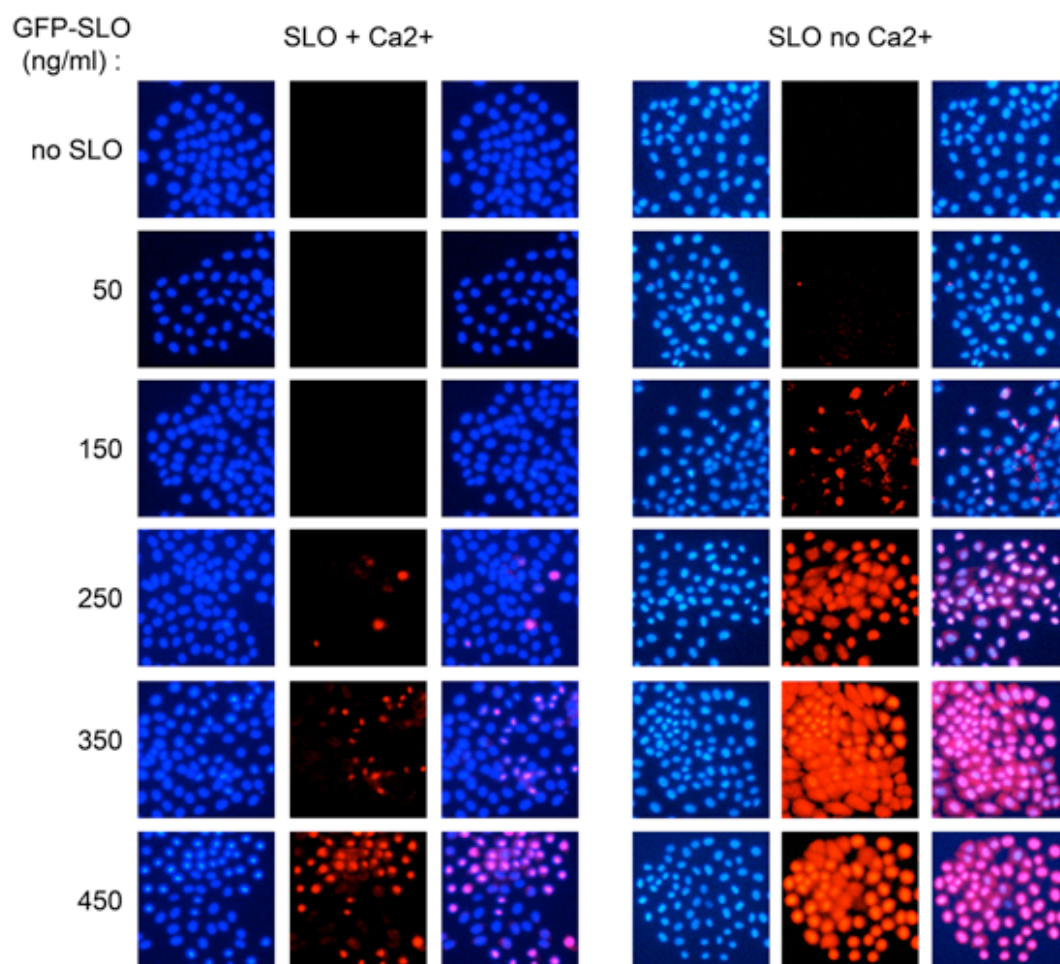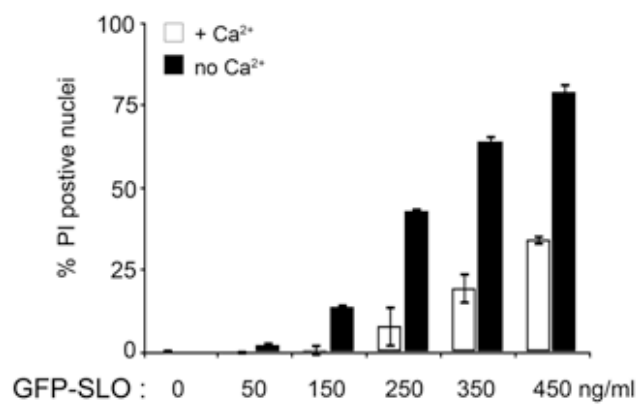

Supplement: NIHMS374567-supplement.pdf [file NIHMS374567-supplement.pdf]
